# Supplementary material for: Graph Neural Network Model for Prediction of Non-Small Cell Lung Cancer Lymph Node Metastasis Using Protein–Protein Interaction Network and 18F-FDG PET/CT Radiomics
Source: MDPI journal article supplement (doi:10.3390/ijms25020698), 2024-01-05

## Supplementary Materials

Supplementary Figure S1: Associations between gene modules and lymph node metastasis traits

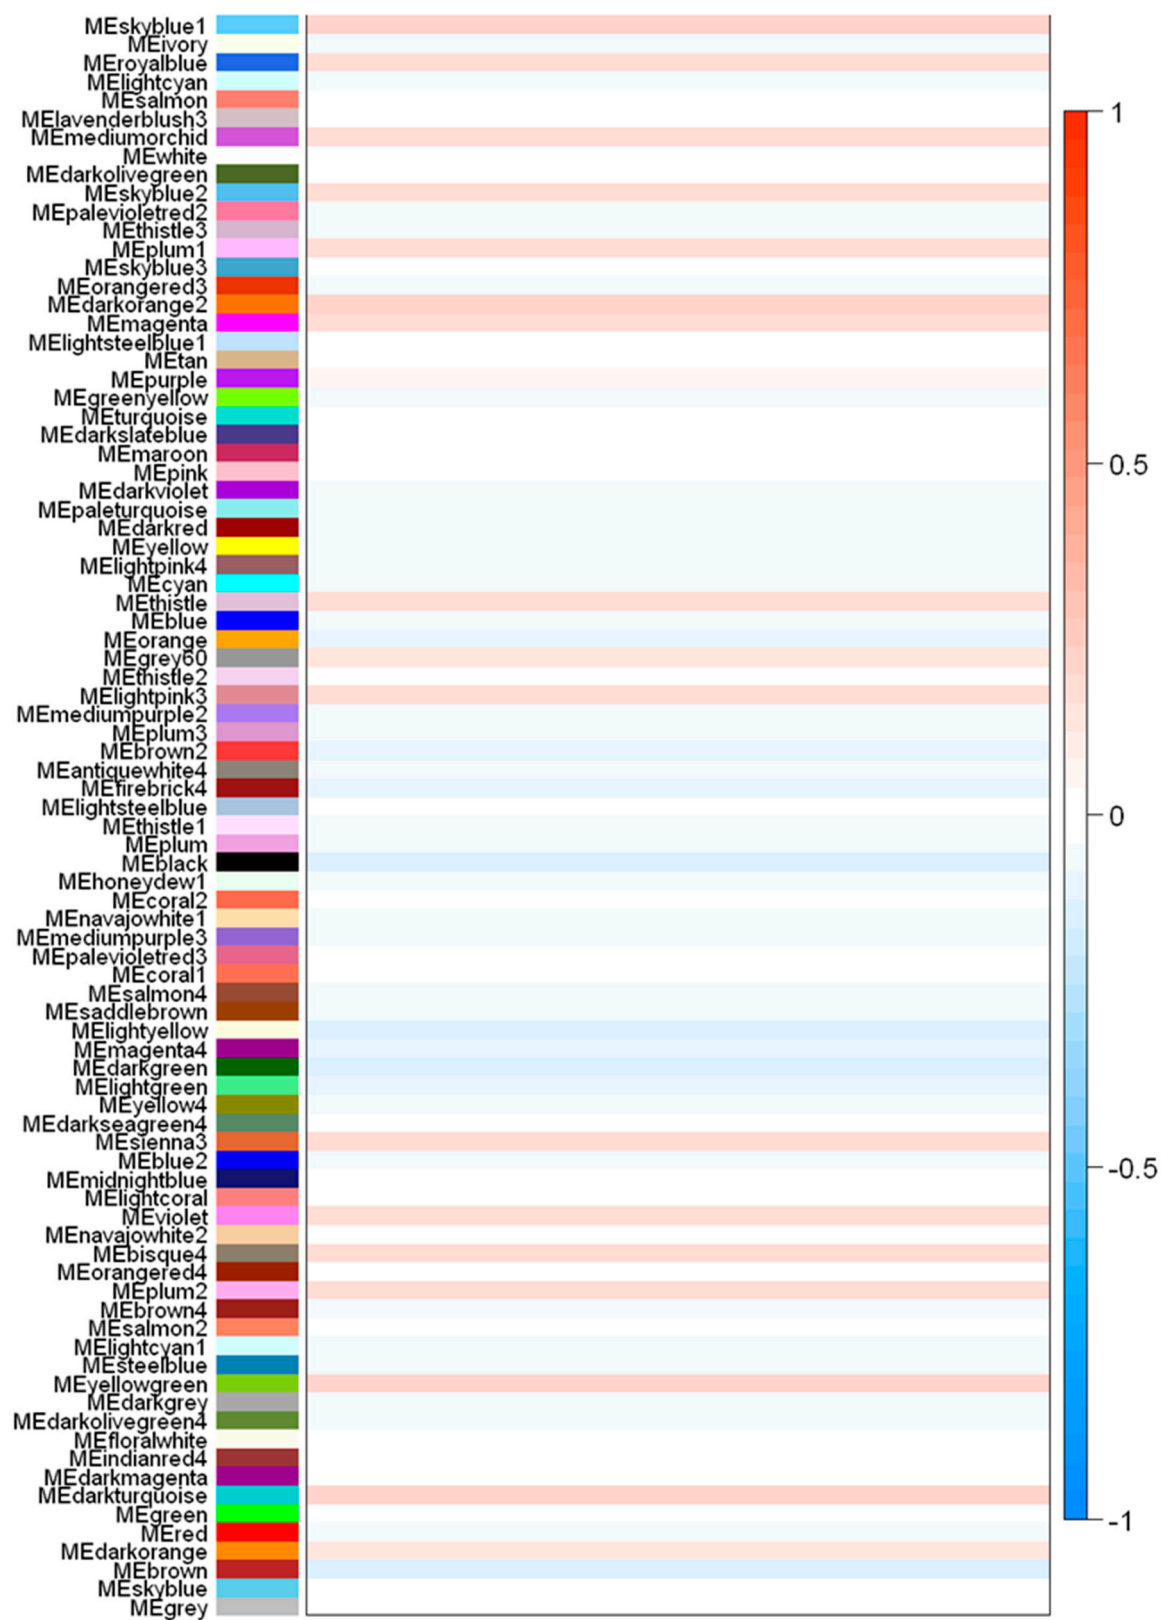

Supplement: s1 [file s1]
